# Supplementary material for: A charge transfer state induced by strong exciton coupling in a cofacial μ-oxo-bridged porphyrin heterodimer
Source: Royal Society of Chemistry journal article supplement (doi:10.1039/d0cp05783e), 2020-12-11
Supplement: d0cp05783e1.pdf [file d0cp05783e1.pdf]

## Supplementary Information

### A Charge Transfer State Induced by Strong Exciton Coupling in a Cofacial $\mu$ -Oxo-bridged Porphyrin Heterodimer

*Niloofar Zarrabi,<sup>a</sup> Brandon J. Bayard,<sup>a</sup> Sairaman Seetharaman,<sup>b</sup> Noah Holzer,<sup>a</sup> Paul Karr,<sup>c</sup> Susanna Ciuti,<sup>d</sup> Antonio Barbon,<sup>d</sup> Marilena Di Valentin,<sup>d</sup> Art van der Est,<sup>e,\*</sup> Francis D'Souza,<sup>b,\*</sup> Prashanth K. Poddutoori<sup>a,\*</sup>*

<sup>a</sup>Department of Chemistry & Biochemistry, University of Minnesota Duluth, 1039 University Drive, Duluth, Minnesota 55812, USA. <sup>b</sup>Department of Chemistry, University of North Texas, 1155 Union Circle, # 305070, Denton, Texas 76203-5017, USA. <sup>c</sup>Department of Physical Sciences and Mathematics, Wayne State College, 111 Main Street, Wayne, Nebraska, 68787, USA. <sup>d</sup>Dipartimento di Scienze Chimiche, Università degli studi di Padova, Via Marzolo 1, 35131 Padova, Italy. <sup>e</sup>Department of Chemistry, Brock University, 1812 Sir Isaac Brock Way, St. Catharines, ON, L2S 3A1, Canada.

#### Experimental Section.

**Synthesis.** All the chemicals, solvents and chromatographic materials were obtained from Aldrich Chemicals, Fisher Chemicals or Alfa Aesar and were used as received.

**Synthesis of PPor-OH.PF<sub>6</sub>:** A solution of OEP (50 mg, 0.093 mmol), CH<sub>3</sub>PCl<sub>2</sub> (50  $\mu$ L, 0.57 mmol) and 2,6-Lutidine (50  $\mu$ L, 0.43 mmol) in dry CH<sub>2</sub>Cl<sub>2</sub> (10 mL) was refluxed for 36 h under nitrogen. The solvent was evaporated and the solute was dried under vacuum. The obtained crude PPor-Cl was dissolved in CH<sub>3</sub>CN (5 mL) and H<sub>2</sub>O (5 mL) was added. The resulting solution was stirred at room temperature for 3-4 h. The solvent was evaporated and the crude product was purified on a neutral alumina column. The column was eluted with C<sub>6</sub>H<sub>6</sub>:CH<sub>3</sub>OH (= 95:5) to remove the low polarity impurities and collect the desired compound as the chloride salt, PPor-OH.Cl. To exchange the counter-ion, the chloride salt was dissolved in 10 mL of ethanol and precipitated with a saturated aqueous solution of NH<sub>4</sub>PF<sub>6</sub>. The precipitate was collected by filtration and washed with water and air dried. At this point, the minor impurities found in the crude product were separated by silica gel column chromatography using CH<sub>2</sub>Cl<sub>2</sub>:EtOAc (= 95:5) as the eluent. The polarity was then increased to CH<sub>2</sub>Cl<sub>2</sub>:CH<sub>3</sub>OH (= 98:2) to elute the desired product PPor-OH.PF<sub>6</sub> in pure form. Yield = 55 mg (80 %). <sup>1</sup>H NMR (400 MHz, CDCl<sub>3</sub>,  $\delta$  ppm): 9.61 (s, 4H), 4.03 (m, 16H), 1.91 (t, 24H), -5.38 (d, 3H,  $J$  = 12.8 Hz).

**Synthesis of AlPor-CH<sub>3</sub> and AlPor-OH:** To a solution of OEP (50 mg, 0.093 mmol) in dry toluene (5 mL) was added AlMe<sub>3</sub> (0.047 mL, 2.0 M in hexane, 0.093 mmol) under nitrogen atmosphere. The resulting reaction solution was stirred for 24 h under dry and inert atmosphere. The compound was purified by flash column chromatography using neutral alumina and toluene as an eluant. The first red colored fraction was collected as AlPor-CH<sub>3</sub>. During the column purification some of the AlPor-CH<sub>3</sub> was converted to AlPor-OH, and was collected separately as a second band. AlPor-CH<sub>3</sub>: Yield = 30 mg (56%). <sup>1</sup>H NMR (400 MHz, CDCl<sub>3</sub>, δ ppm): 10.35 (s, 4H), 4.00 (m, 16H), 1.82 (t, 26), -6.53 (s, 3H). AlPor-OH: Yield = 20 mg (37%). <sup>1</sup>H NMR (400 MHz, CDCl<sub>3</sub>, δ ppm): 10.31 (s, 4H), 4.17 (m, 16H), 1.97 (t, 24).

**Synthesis of AlPor-O-PPor.PF<sub>6</sub>:** To a solution of OEP (50 mg, 0.093 mmol) in dry toluene (5 mL) was added AlMe<sub>3</sub> (0.047 mL, 0.093 mmol) under nitrogen atmosphere. The resulting reaction solution was stirred for 24 h under dry and inert atmosphere. To this PPor-OH.Cl (80 mg, 0.126 mmol) was added and the reaction was further stirred for 24 h. After this time, the reaction was purified by neutral alumina chromatography. For solubility reasons the minimum amount of CH<sub>2</sub>Cl<sub>2</sub> needed to completely dissolve the crude product was added to the reaction solution before it was loaded on the column. The column was eluted initially with benzene followed by a 95:5 benzene: methanol mixture to remove the low polarity impurities. The desired heterodimer was collected by increasing the solvent polarity to an 80:20 benzene:methanol mixture. To exchange the counter-ion, the chloride salt was dissolved in 20 mL of methanol and precipitated with NH<sub>4</sub>PF<sub>6</sub> (500 mg). The precipitate was collected by filtration and washed with cold methanol and water and air dried. Yield = 85 mg (75 %). HR ESI MS: *m/z* 1153.6362 for [M-PF<sub>6</sub>]<sup>+</sup> calculated 1153.6869 for C<sub>73</sub>H<sub>91</sub>AlN<sub>8</sub>OP<sup>+</sup>. <sup>1</sup>H NMR (400 MHz, CDCl<sub>3</sub>, δ ppm): 9.08 (s, 4H), 8.45 (s, 4H), 4.19 (m, 8H), 4.05 (m, 8H), 3.93 (m, 16H), 1.84 (t, 26), 1.69 (t, 24H), -7.93 (d, 3H, *J* = 16 Hz); <sup>31</sup>P NMR (162 MHz, CDCl<sub>3</sub>, δ ppm): -191 (s), -144 (sept, *J* = 712 Hz).

## Methods.

**NMR and mass spectroscopy.** NMR spectra were recorded with Bruker 400 MHz NMR spectrometer using CDCl<sub>3</sub> as the solvent. ESI mass spectra were recorded on a Bruker MicroTOF-III mass spectrometer.

**Electrochemistry.** Cyclic and differential pulse voltammetric experiments (CH<sub>2</sub>Cl<sub>2</sub>, 0.1 M tetrabutylammonium perchlorate, (TBAP)) were performed on a BAS Epsilon electrochemical analyzer (working electrode: glassy carbon, auxiliary electrodes: Pt wire, reference electrode: Ag wire). The ferrocene couple (*E*<sub>1/2</sub> (Fc<sup>+</sup>/Fc) = 0.48 V in DCM, 0.1M TBAP under our experimental conditions) was used to calibrate the redox potential values.

**Absorption spectroscopy.** Steady-state UV-visible absorption spectra were recorded with a Cary 100 UV-VIS spectrometer. The concentrations of the samples used for these measurements ranged from  $10^{-6}$  M (porphyrin Soret band) to  $10^{-5}$  M (Q-bands bands) solutions.

**Fluorescence spectroscopy.** Steady-state fluorescence spectra were recorded using a Photon Technologies International Quanta Master 8075-11 spectrofluorometer, equipped with a 75 W xenon lamp, running FelixGX software. An excitation wavelength 550 nm, exclusively porphyrin, was used and the concentrations were held constant at 0.1 mM for all the compounds. The fluorescence lifetimes were evaluated by using a Horiba Yvon Nanolog coupled with time-correlated single photon counting with nanoLED excitation sources. A right-angle detection method was used.

**Transient absorption spectroscopy.** Femtosecond transient absorption spectroscopy experiments were performed using an Ultrafast Femtosecond Laser Source (Libra) by Coherent incorporating a diode-pumped, mode locked Ti:Sapphire laser (Vitesse) and diode-pumped intracavity doubled Nd:YLF laser (Evolution) to generate a compressed laser output of 1.5 W. For optical detection, a Helios transient absorption spectrometer provided by Ultrafast Systems LLC coupled with an optical parametric amplifier (OPA) provided by Light Conversion was used. The source for the pump and probe pulses were derived from the fundamental output of the Libra laser (Compressed output 1.5 W, pulse width 100 fs) at a repetition rate of 1 kHz. 95% of the fundamental output of the laser was introduced into the OPA, while the rest of the output was used for generation of the white light continuum. In the present study, the maximum absorption wavelength for each compound was used in all the experiments. Kinetic traces at appropriate wavelengths were assembled from the time-resolved spectral data. Data analysis was performed using Surface Xplorer software supplied by Ultrafast Systems. All measurements were conducted in degassed solutions at 298 K.

**TR-EPR spectroscopy.** TR-EPR spectra were recorded at X-band on a Bruker Eleksys E580 spectrometer equipped with a dielectric cavity and a CF935 cryostat. The microwave power used for the TR-EPR experiments was about 0.2 mW. Experiments were performed at a temperature of 80K using cold nitrogen gas as the cryogen and an Oxford ITC503 temperature controller to regulate the temperature. TR-EPR spectra were recorded in direct detection mode without field modulation; the signal was sampled with a LeCroy 9361 oscilloscope (20 ns per point). The time resolution of the spectrometer has been estimated to be about 2.0  $\mu$ s. Photoexcitation was performed using a Nd:YAG laser (Quantel Rainbow) equipped with an optical parametric oscillator (OPOTECH) pumped by the third harmonic module, operating at a 10Hz repetition rate. Laser pulses were 5 ns long, with energies of about 3 mJ and a wavelength of 575 nm. To avoid magnetophotoselection effects the data were collected with the polarization of the laser parallel and perpendicular to the magnetic field. Spectra from the two

measurements were then added in the ratio  $I_{||} + 2I_{\perp}$  to obtain the spectrum corresponding to isotropic excitation. The polarization of the light with respect to the magnetic field was controlled through a half-wave plate and a polarizing filter near the optical window of the cavity.

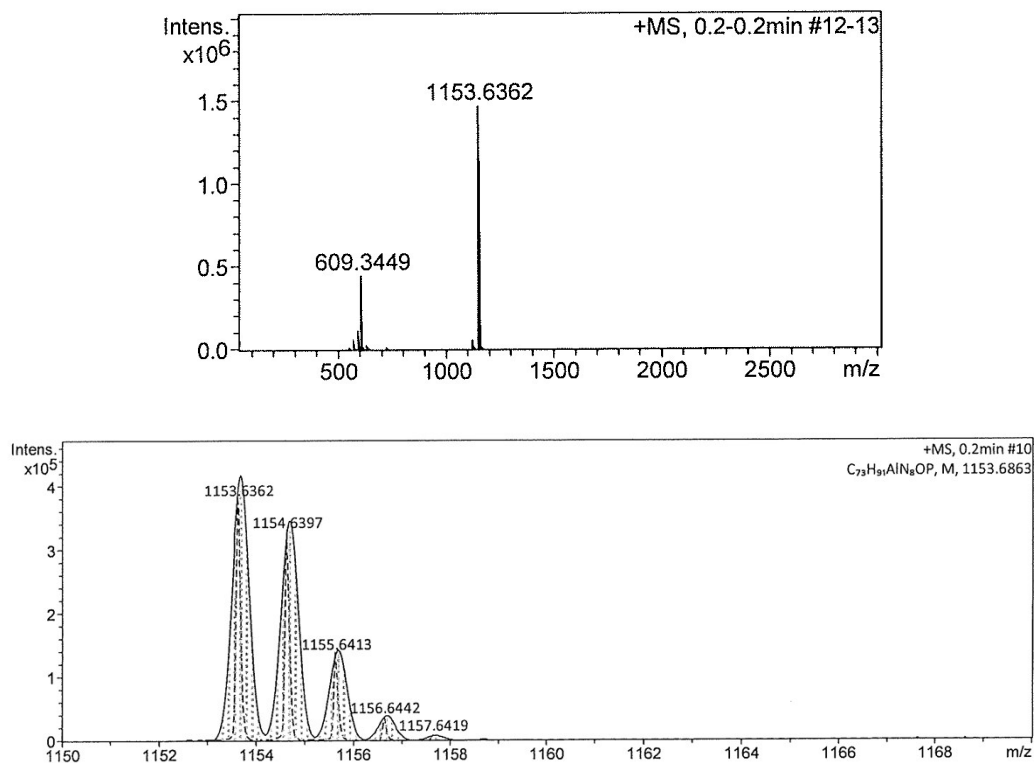

**Figure S1.** High resolution ESI mass spectra of AlPor-O-PPor.PF<sub>6</sub>

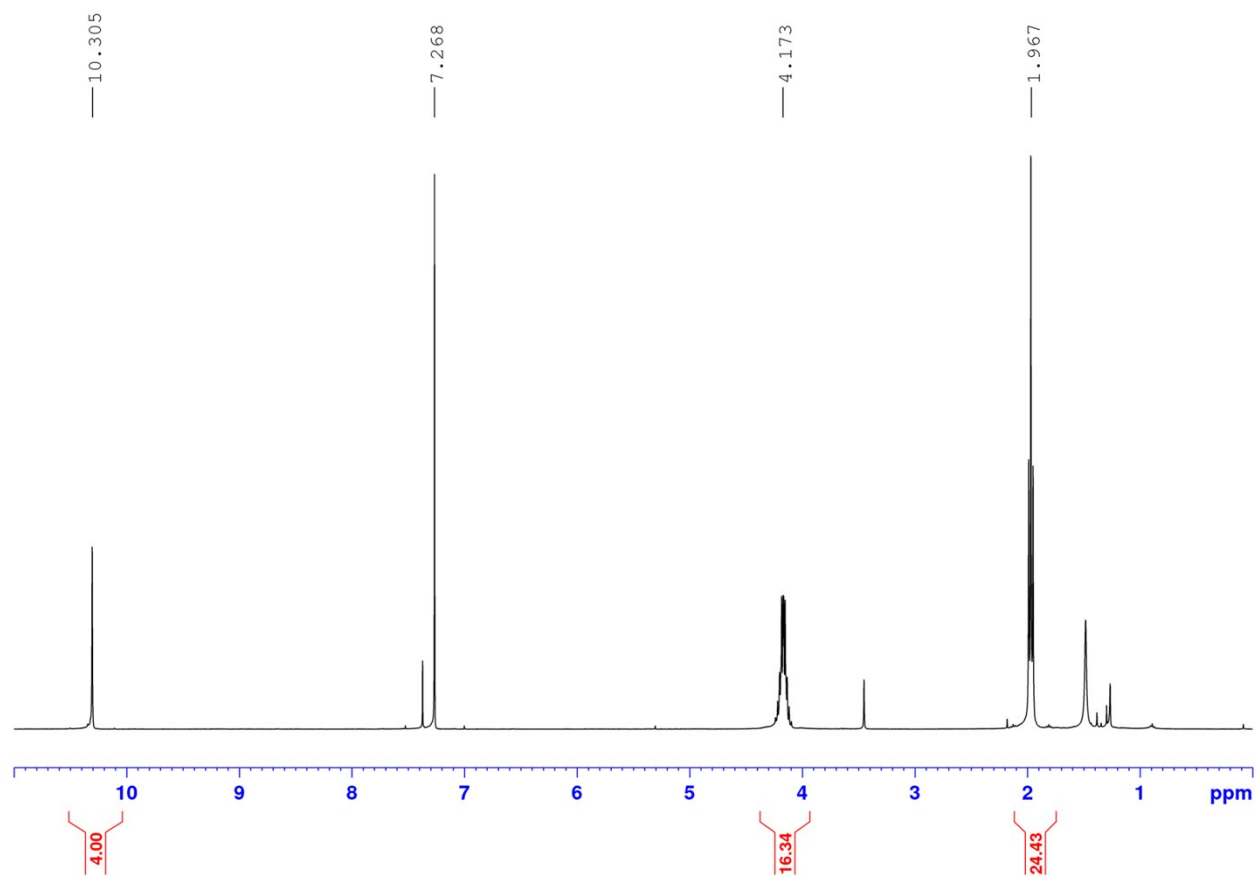

**Figure S2.** <sup>1</sup>H NMR (400 MHz) spectrum of AlPor-OH in CDCl<sub>3</sub>.

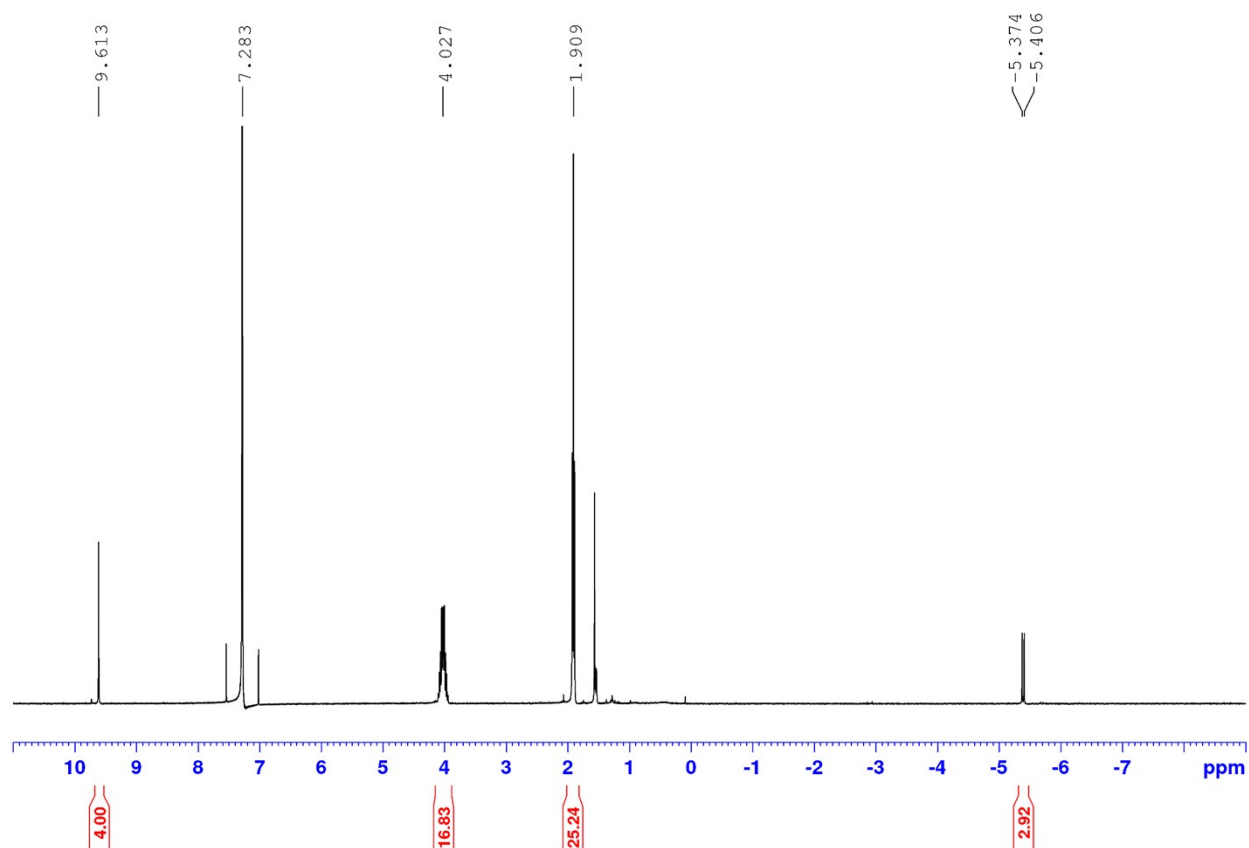

**Figure S3.**  $^1\text{H}$  NMR (400 MHz) spectrum of PPor-OH.PF<sub>6</sub> in CDCl<sub>3</sub>.

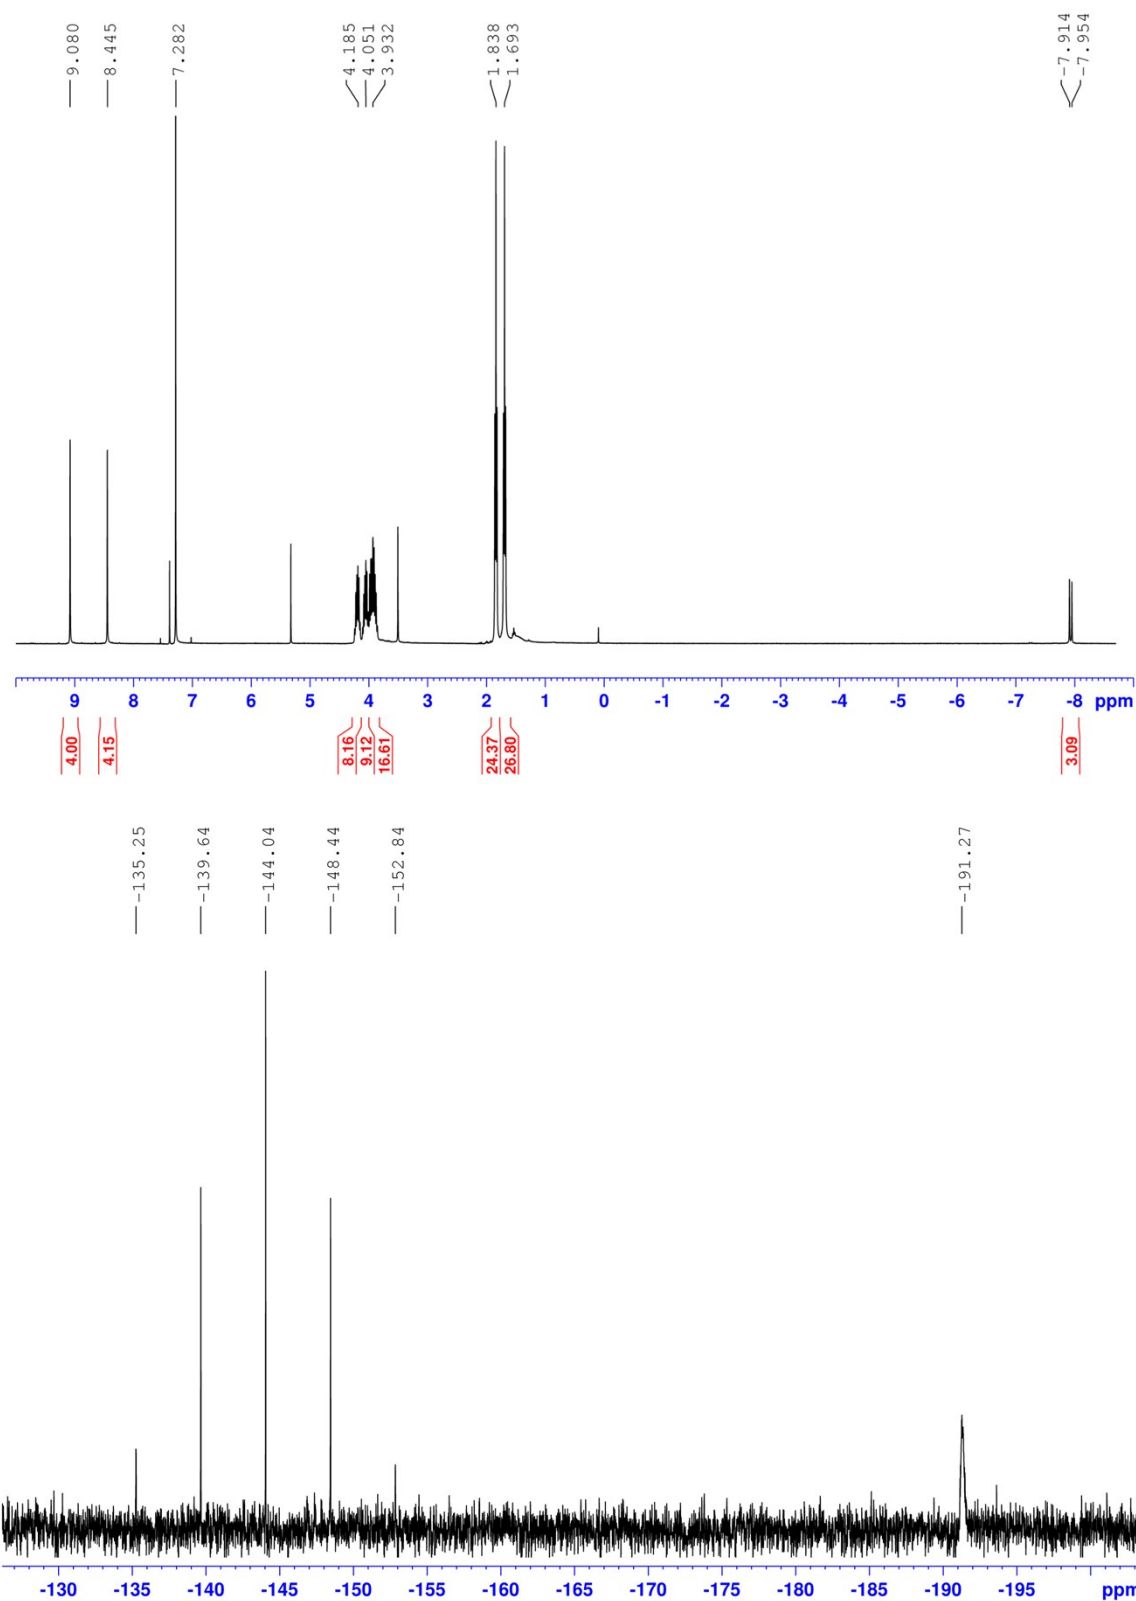

**Figure S4.**  $^1\text{H}$  NMR (400 MHz) and  $^{31}\text{P}$  NMR (162 MHz) spectrum of AlPor-O-PPor.PF<sub>6</sub> in CDCl<sub>3</sub>.

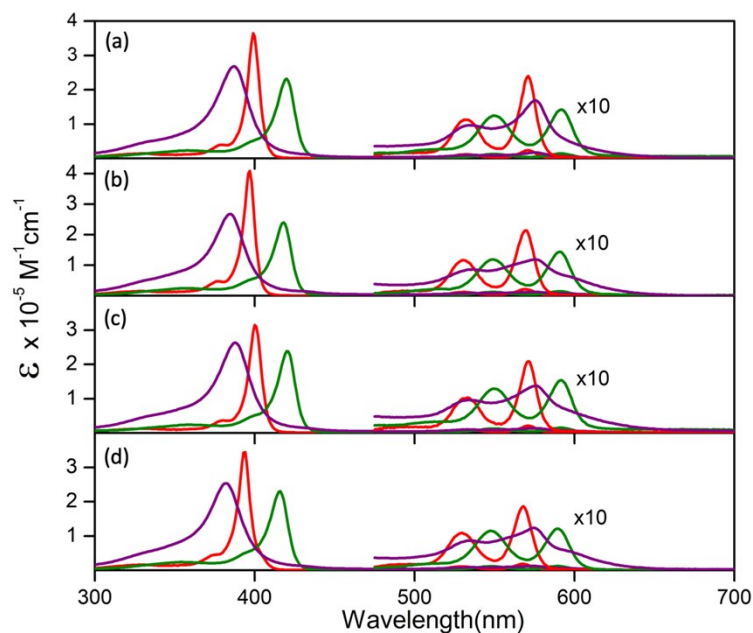

**Figure S5.** (a) Absorption spectra of AlPor-OH (red), PPor-OMe.PF<sub>6</sub> (green), and AlPor-O-PPor.PF<sub>6</sub> (purple) in (a) toluene, (b) CH<sub>2</sub>Cl<sub>2</sub>, (c) *o*-DCB and (d) CH<sub>3</sub>CN.

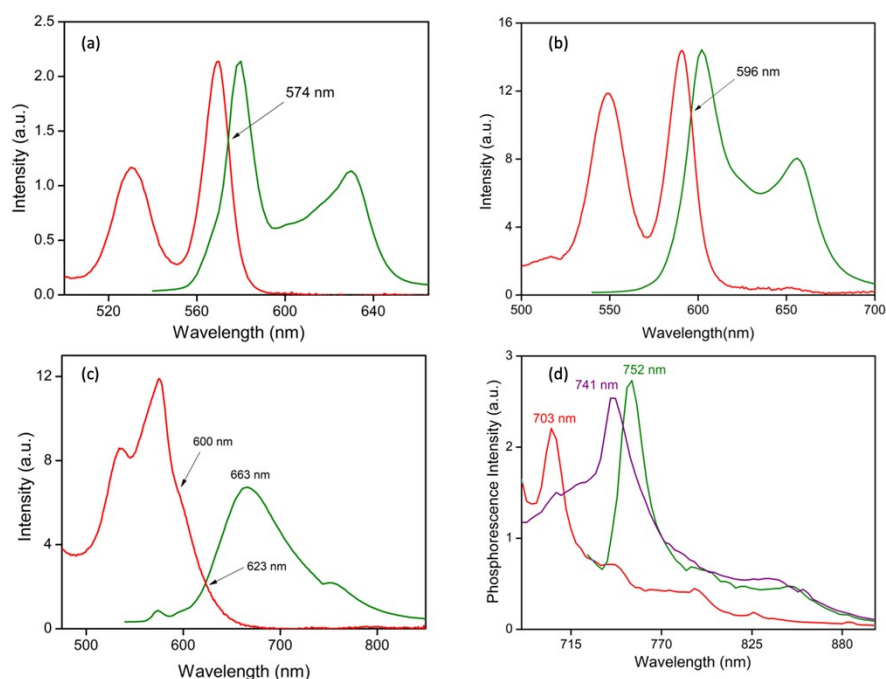

**Figure S6.** Superposition of the absorption (red) and fluorescence (green) spectra of (a) AlPor-OH, (b) PPor-OMe.PF<sub>6</sub>, and (c) AlPor-O-PPor.PF<sub>6</sub> in CH<sub>2</sub>Cl<sub>2</sub>. (d) Phosphorescence spectra of AlPor-OH (red, excitation at 570 nm), PPor-OMe.PF<sub>6</sub> (green, excitation at 550 nm) and AlPor-O-PPor.PF<sub>6</sub> (purple, excitation at 570 nm) in degassed CH<sub>2</sub>Cl<sub>2</sub>:THF (=1:3) with few drop of 1,2-dibromoethane mixture at 77K.

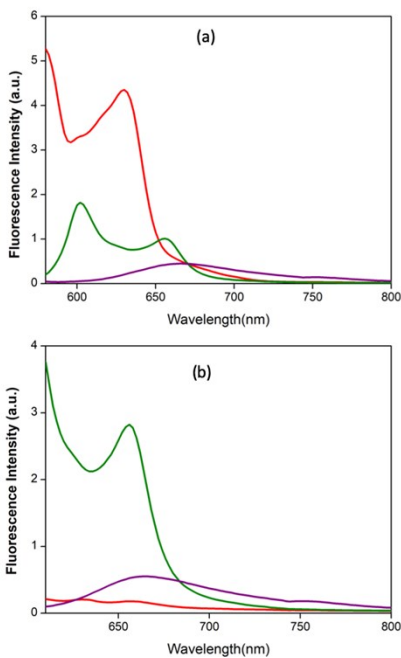

**Figure S7.** Fluorescence spectra of AlPor-OH (red), PPor-OMe.PF<sub>6</sub> (green) and AlPor-O-PPor.PF<sub>6</sub> (purple) in CH<sub>2</sub>Cl<sub>2</sub>: (a) excitation at 570 nm and (b) excitation at 600 nm.

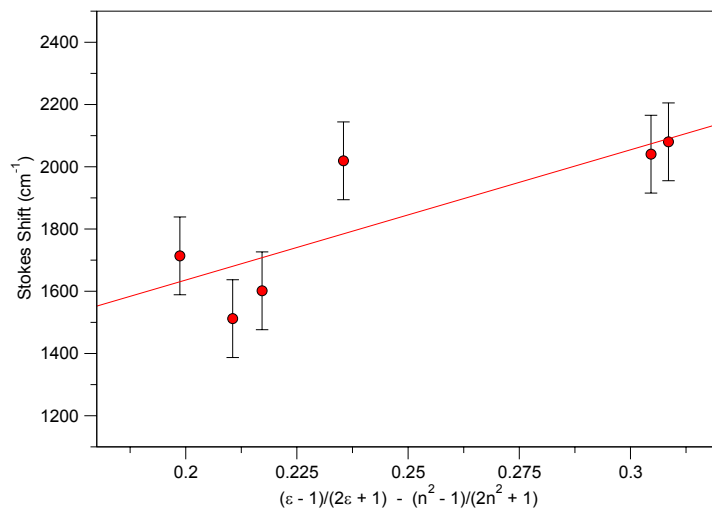

**Figure S8.** Lippert-Mataga plot of the Stokes shift of AlPor-O-PPor.PF<sub>6</sub> in several solvents (tetrahydrofuran, dichloromethane, o-dichlorobenzene, benzonitrile, methanol, acetonitrile).

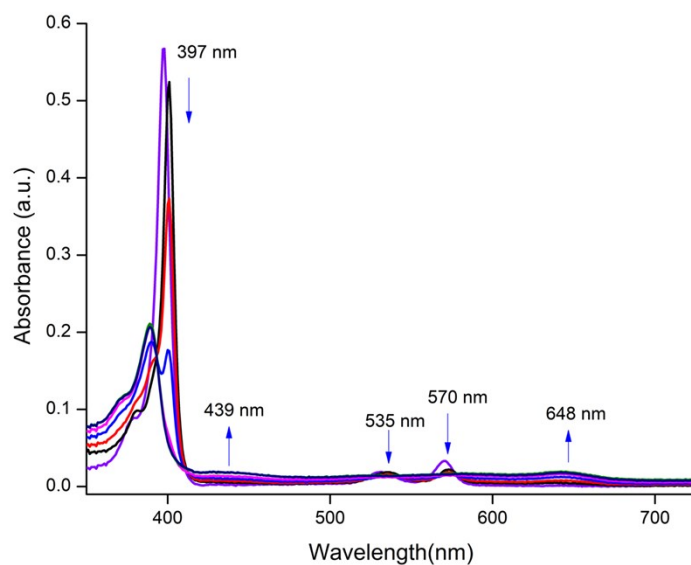

**Figure S9.** Spectral changes during the oxidation of AlPor-OH with  $\text{Fe}(\text{ClO}_4)_3$  in  $\text{CHCl}_3$  with 0.2 M TBA. $\text{ClO}_4$ .

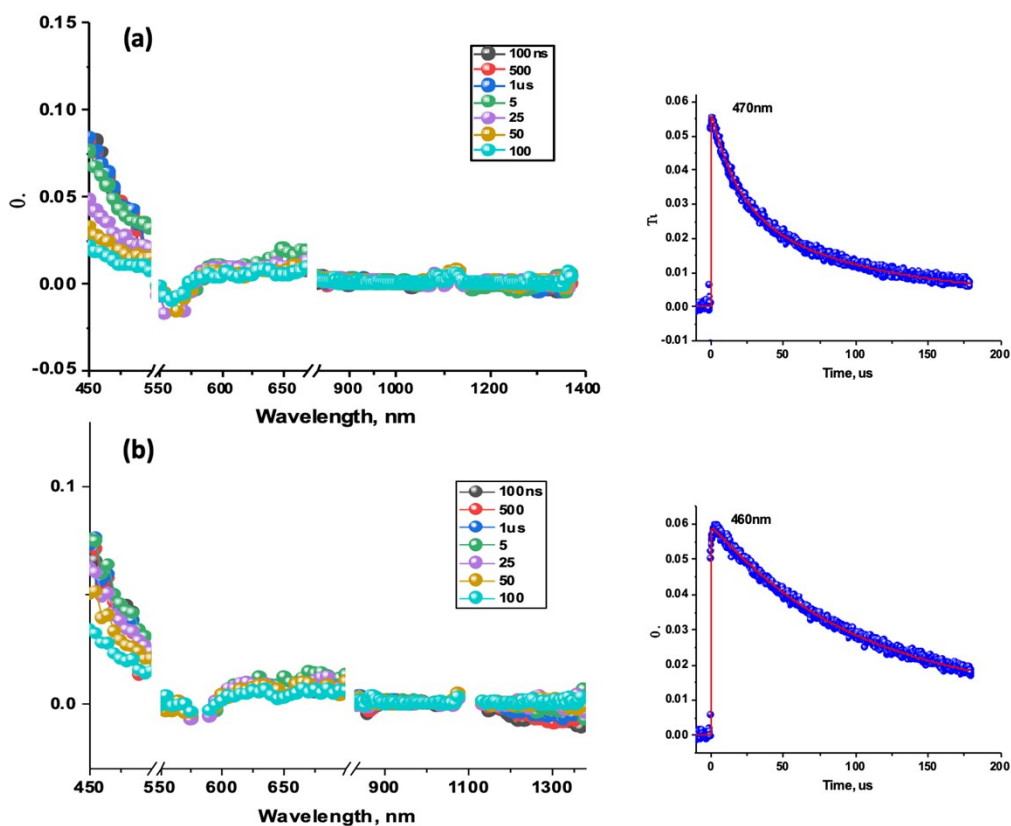

**Figure S10.** Nanosecond transient absorption spectra of (a) AlPor-OH and (b) PPor-OMe. $\text{PF}_6$  in o-DCB at the excitation wavelength of 533 nm.
